# Supplementary material for: The prism model: advancing a&nbsp;theory of practice for arts and humanities in medical education
Source: Springer Nature journal article supplement (doi:10.1007/s40037-021-00661-0), 2021-04-29
Supplement: MOESM2 [file 19119164]

**Figure 1 | Teaching social justice using the Prism Model**

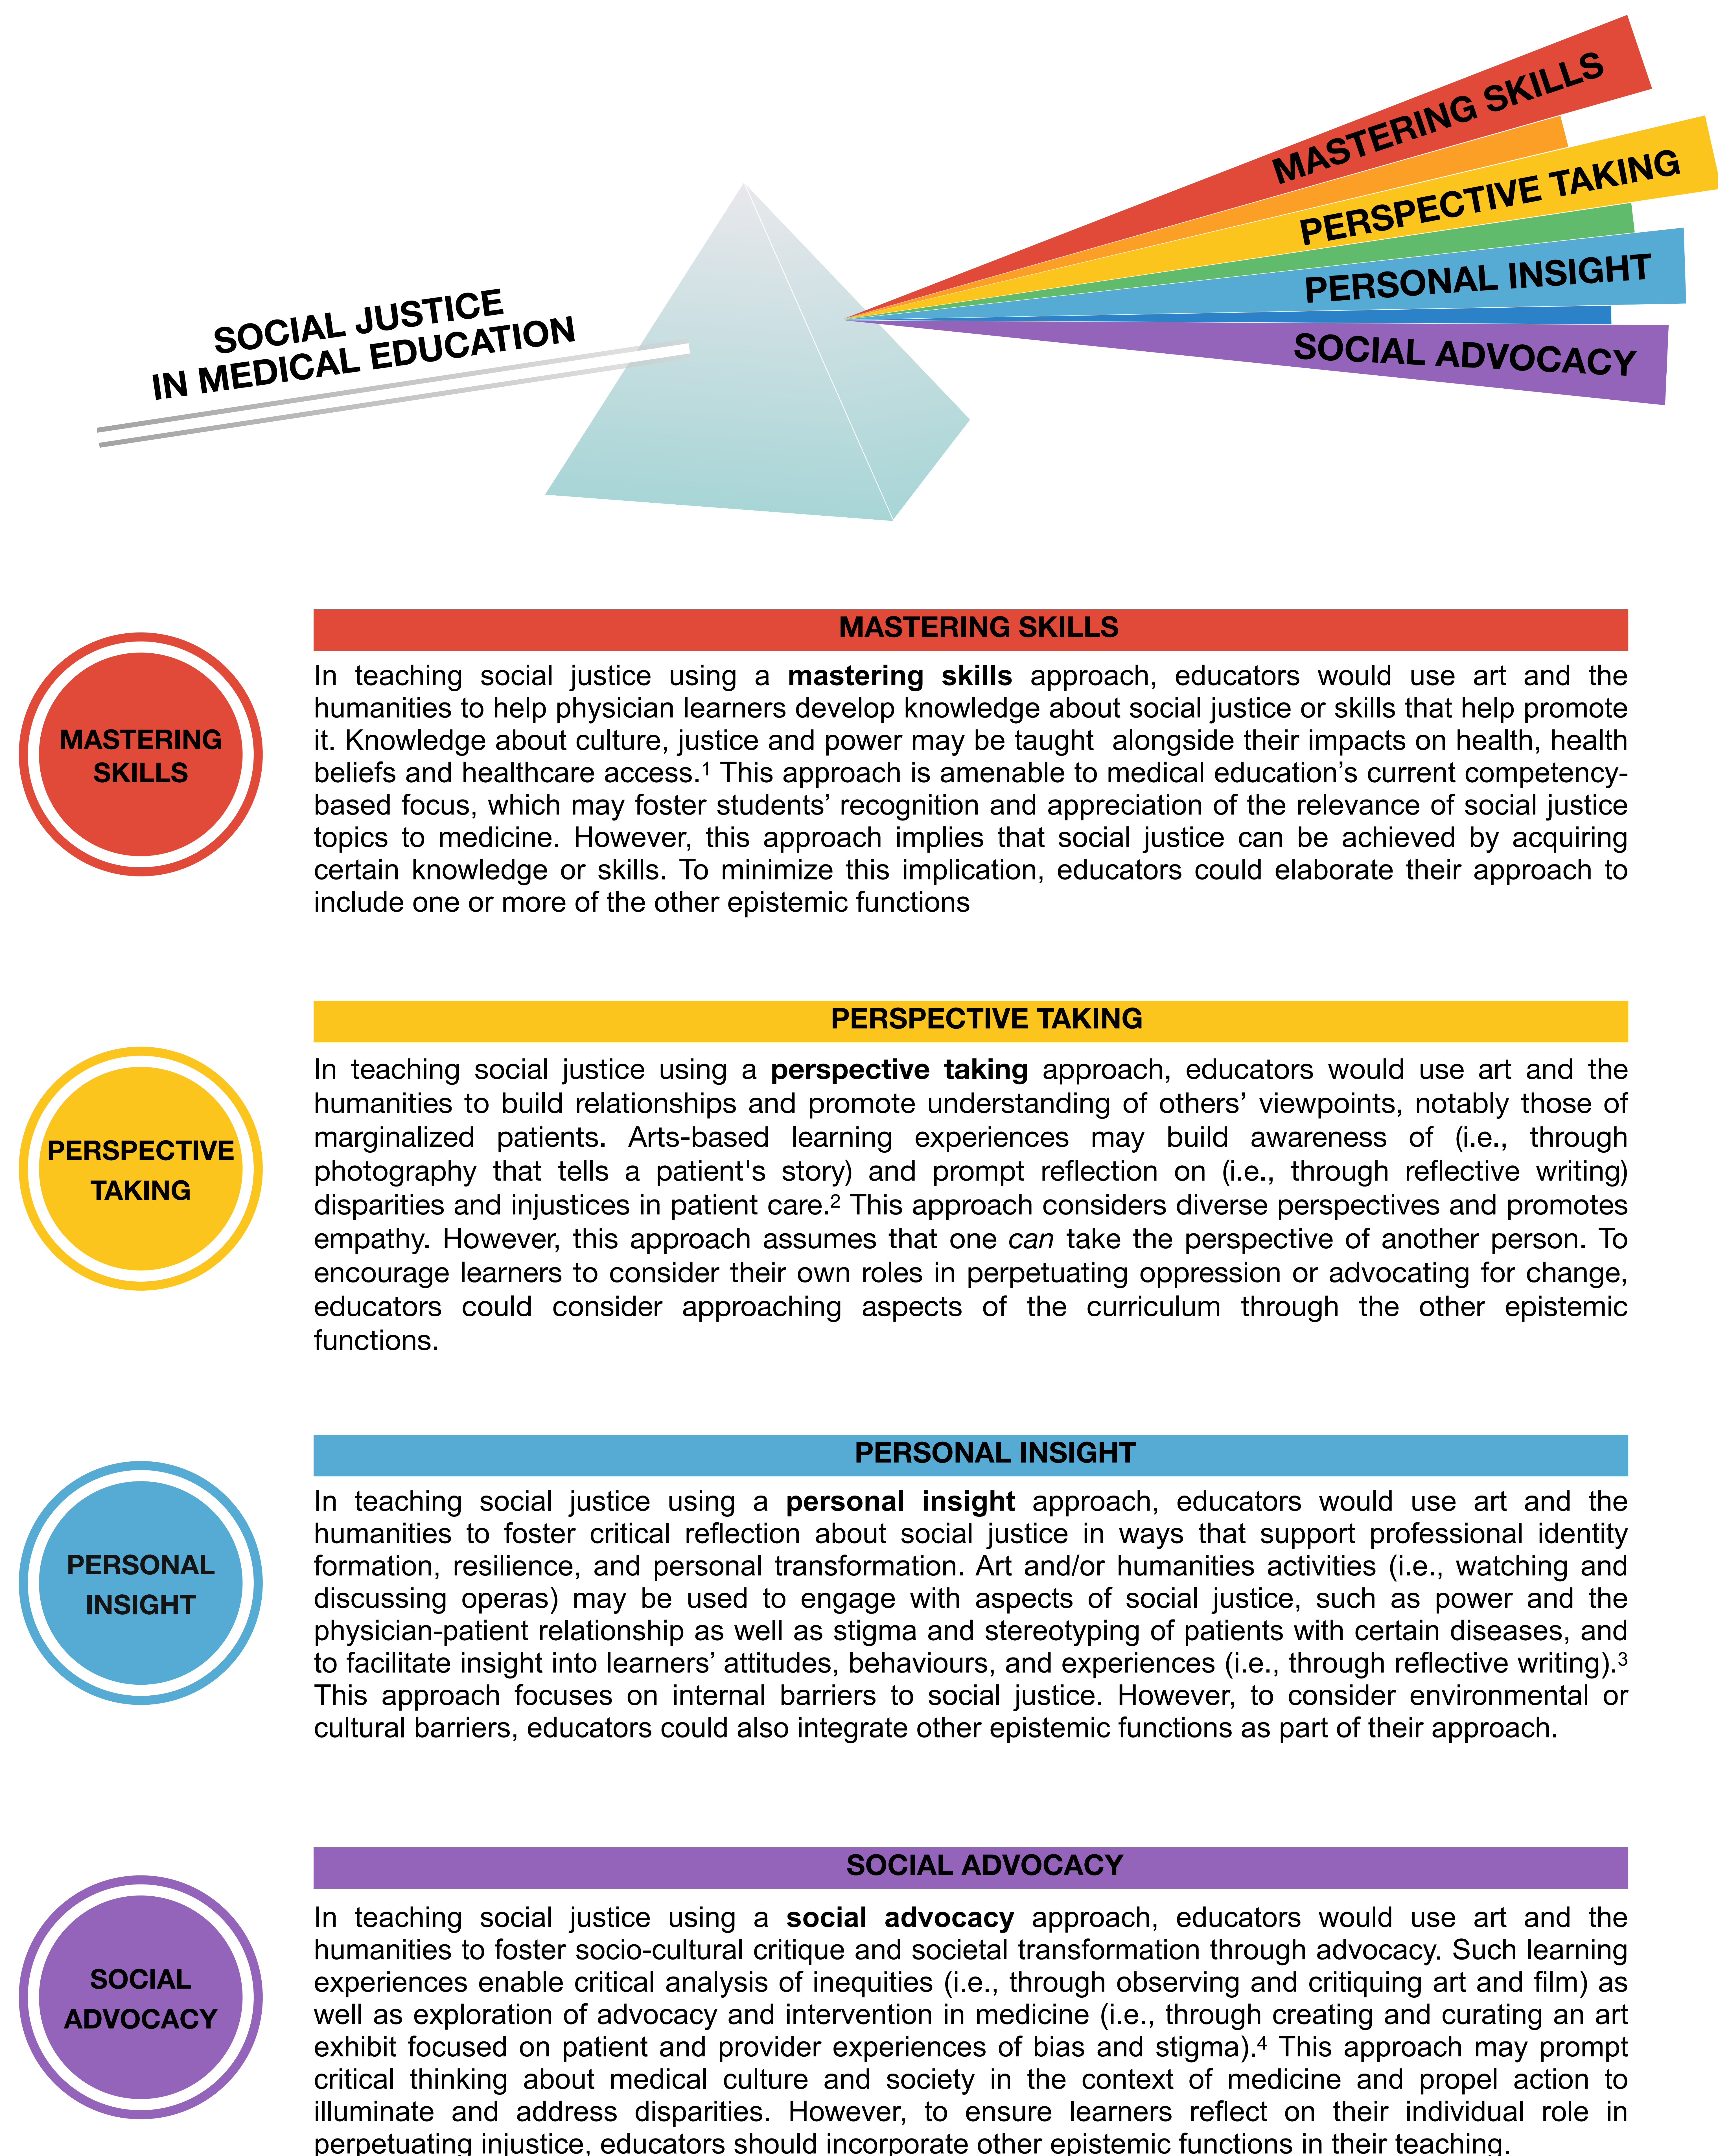

**References:**

1. Kuper A, Veinot P, Leavitt J, Levitt S, et al. Epistemology, culture, justice and power: Nonbioscientific knowledge for medical training. *Med Educ.* 2017;51(2): 158-173. doi: 10.1111/medu.13115
2. Ross PT, Lyson ML. Using artistic-narrative to stimulate reflection on physician bias. *Teach Learn Med.* 2014;26(4): 344-349. doi:10.1080/10401334.2014.945032
3. Levin SR, Cai F, Noronha N, et al. Diseases, doctors, and divas: Cultivating reflective capacity in preclinical medical students through a critical examination of opera. *Journal for Learning through the Arts.* 2017;13(1). doi: 10.21977/D913128321
4. Jones T. Moving Pictures: Visual culture/visual activism in the health humanities classroom. In: Olivia Banner et al, ed. *Teaching Health Humanities.* New York, NY: Oxford University Press; 2019
